# Supplementary material
Source: publisher site journal article supplement (https://www.dovepress.com/article/535276)

**Supplemental Materials**

**Supplemental Table S1– Association between exposure (X) and index disease (Y) in crude and comorbidity (C) adjusted models when comorbidity is a confounder, with comorbidity variable type**

|  |  | **Risk Difference (RD)** | | **Risk ratio (RR)** | | **Odds ratio (OR)** | | **Least square mean difference (LSMD)** | |
| --- | --- | --- | --- | --- | --- | --- | --- | --- | --- |
| **Comorbidity (C)** | **Model** | RD [95%CI] | Bias | RR [95%CI] | Bias | RD [95%CI] | Bias | RR [95%CI] | Bias |
| Categorical variable with 4 levels | Crude | 0.22 (0.2, 0.24) | 9.60% | 2.33 (2.16, 2.52) | 16.50% | 2.26 (2.04, 2.49) | 12.80% | 2.39 (2.3, 2.49) | 19.70% |
| Adjusted | 0.2 (0.18, 0.22) | 0% | 2 (1.85, 2.17) | 0% | 2 (1.8, 2.22) | 0.10% | 2 (1.91, 2.09) | 0% |
| Continuous variable | Crude | 0.21 (0.19, 0.23) | 4.70% | 2.27 (2.16, 2.39) | 13.70% | 2.25 (2.07, 2.45) | 12.50% | 3.42 (3.25, 3.59) | 71% |
| Adjusted | 0.2 (0.18, 0.22) | 0% | 2 (1.9, 2.1) | -0.20% | 2 (1.83, 2.18) | 0.10% | 2 (1.88, 2.13) | 0.10% |

**Supplemental Table S2– Association between exposure (X) and index disease (Y) in crude and comorbidity (C) adjusted models for different causal scenarios**

|  |  | **Risk Difference (RD)** | | **Risk ratio (RR)** | | **Odds ratio (OR)** | | **Least square mean difference (LSMD)** | |
| --- | --- | --- | --- | --- | --- | --- | --- | --- | --- |
| **DAG** | **Model** | RD [95%CI] | Bias | RR [95%CI] | Bias | RD [95%CI] | Bias | RR [95%CI] | Bias |
| 1 | Crude | 0.23 (0.22, 0.25) | 17.20% | 2.24 (2.13, 2.35) | 12.10% | 2.21 (2.03, 2.40) | 10.40% | 2.34 (2.20, 2.49) | 17.10% |
| Adjusted | 0.20 (0.18, 0.22) | 0.10% | 2.00 (1.90, 2.10) | 0% | 2.00 (1.84, 2.18) | 0% | 2.00 (1.86, 2.14) | 0% |
| Adjusted for non-differentially misclassified C | 0.22 (0.20, 0.23) | 7.70% | 2.11 (2.01, 2.21) | 5.30% | 2.09 (1.92, 2.28) | 4.60% | 2.15 (2.01, 2.30) | 7.60% |
| Adjusted for differentially misclassified C | 0.22 (0.20, 0.24) | 8.10% | 2.11 (2.01, 2.22) | 5.70% | 2.11 (1.94, 2.30) | 5.60% | 2.19 (2.04, 2.33) | 9.30% |
| 2 | Crude | 0.20 (0.18, 0.22) | 0.10% | 2.00 (1.90, 2.11) | 0% | 2.00 (1.82, 2.18) | -0.20% | 2.00 (1.86, 2.14) | 0% |
| Adjusted | 0.14 (0.12, 0.16) | -29.90% | 1.71 (1.62, 1.81) | -14.30% | 1.72 (1.56, 1.89) | -14% | 1.40 (1.26, 1.54) | -30% |
| Adjusted for non-differentially misclassified C | 0.17 (0.15, 0.19) | -16.20% | 1.84 (1.74, 1.94) | -7.90% | 1.84 (1.68, 2.02) | -7.90% | 1.68 (1.53, 1.82) | -16.20% |
| Adjusted for differentially misclassified C | 0.17 (0.16, 0.19) | -13.20% | 1.88 (1.79, 1.99) | -5.80% | 1.89 (1.73, 2.07) | -5.30% | 1.77 (1.63, 1.91) | -11.40% |
| 3 | Crude | 0.20 (0.18, 0.22) | -0.20% | 2.00 (1.90, 2.11) | 0% | 2.00 (1.84, 2.17) | 0% | 2.00 (1.89, 2.11) | 0% |
| Adjusted | 0.16 (0.15, 0.18) | -17.90% | 1.83 (1.73, 1.93) | -8.50% | 1.80 (1.65, 1.96) | -10% | 1.00 (0.90, 1.09) | -50.10% |
| Adjusted for non-differentially misclassified C | 0.18 (0.16, 0.20) | -9.20% | 1.91 (1.82, 2.02) | -4.30% | 1.89 (1.74, 2.05) | -5.50% | 1.49 (1.39, 1.60) | -25.40% |
| Adjusted for differentially misclassified C | 0.20 (0.19, 0.22) | 1.70% | 2.02 (1.92, 2.13) | 1.10% | 2.00 (1.84, 2.17) | 0.10% | 1.40 (1.29, 1.51) | -30.10% |
| 4 | Crude | 0.20 (0.18, 0.22) | 0% | 2.00 (1.90, 2.11) | 0% | 2.00 (1.84, 2.17) | 0% | 2.00 (1.89, 2.11) | 0.10% |
| Adjusted | 0.20 (0.18, 0.22) | 0% | 2.00 (1.90, 2.11) | 0% | 2.00 (1.84, 2.17) | 0% | 2.00 (1.89, 2.11) | 0.10% |
| Adjusted for non-differentially misclassified C | 0.20 (0.18, 0.22) | 0.10% | 2.00 (1.90, 2.11) | 0% | 2.00 (1.84, 2.17) | 0% | 2.00 (1.89, 2.11) | 0.10% |
| Adjusted for differentially misclassified C | 0.20 (0.18, 0.22) | 0% | 2.00 (1.90, 2.11) | 0% | 2.00 (1.84, 2.17) | 0% | 2.00 (1.89, 2.11) | 0.10% |
| 5 | Crude | 0.20 (0.18, 0.22) | -0.10% | 2.00 (1.90, 2.10) | -0.20% | 1.95 (1.80, 2.11) | -2.70% | 2.00 (1.86, 2.14) | 0% |
| Adjusted | 0.20 (0.18, 0.22) | 0% | 2.00 (1.91, 2.10) | -0.10% | 2.00 (1.84, 2.17) | 0% | 2.00 (1.87, 2.13) | 0% |
| Adjusted for non-differentially misclassified C | 0.20 (0.18, 0.22) | 0% | 2.00 (1.91, 2.10) | -0.10% | 1.98 (1.82, 2.14) | -1.20% | 2.00 (1.86, 2.13) | 0% |
| Adjusted for differentially misclassified C | 0.21 (0.19, 0.23) | 4.90% | 2.16 (2.07, 2.28) | 8.10% | 2.10 (1.94, 2.28) | 5% | 2.17 (2.03, 2.30) | 8.40% |
| 6 | Crude | 0.20 (0.18, 0.22) | 0% | 2.00 (1.93, 2.08) | 0% | 2.00 (1.84, 2.17) | 0% | 2.00 (1.89, 2.11) | 0% |
| Adjusted | 0.18 (0.16, 0.20) | -8.80% | 1.90 (1.84, 1.97) | -4.80% | 2.00 (1.84, 2.17) | 0% | 1.36 (1.27, 1.45) | -32.10% |
| Adjusted for non-differentially misclassified C | 0.19 (0.17, 0.21) | -5% | 1.95 (1.88, 2.02) | -2.70% | 2.00 (1.84, 2.18) | 0% | 1.68 (1.58, 1.79) | -16% |
| Adjusted for differentially misclassified C | 0.20 (0.18, 0.22) | -0.90% | 1.97 (1.90, 2.04) | -1.70% | 2.12 (1.94, 2.30) | 5.80% | 1.50 (1.39, 1.60) | -25.20% |

**Figure S1:** Association between exposure (X) and index disease (Y) in crude and comorbidity (C) adjusted models with different levels of misclassification of C in causal structures DAG 1 (comorbidity is a confounder) and DAG 2 (comorbidity is a mediator)


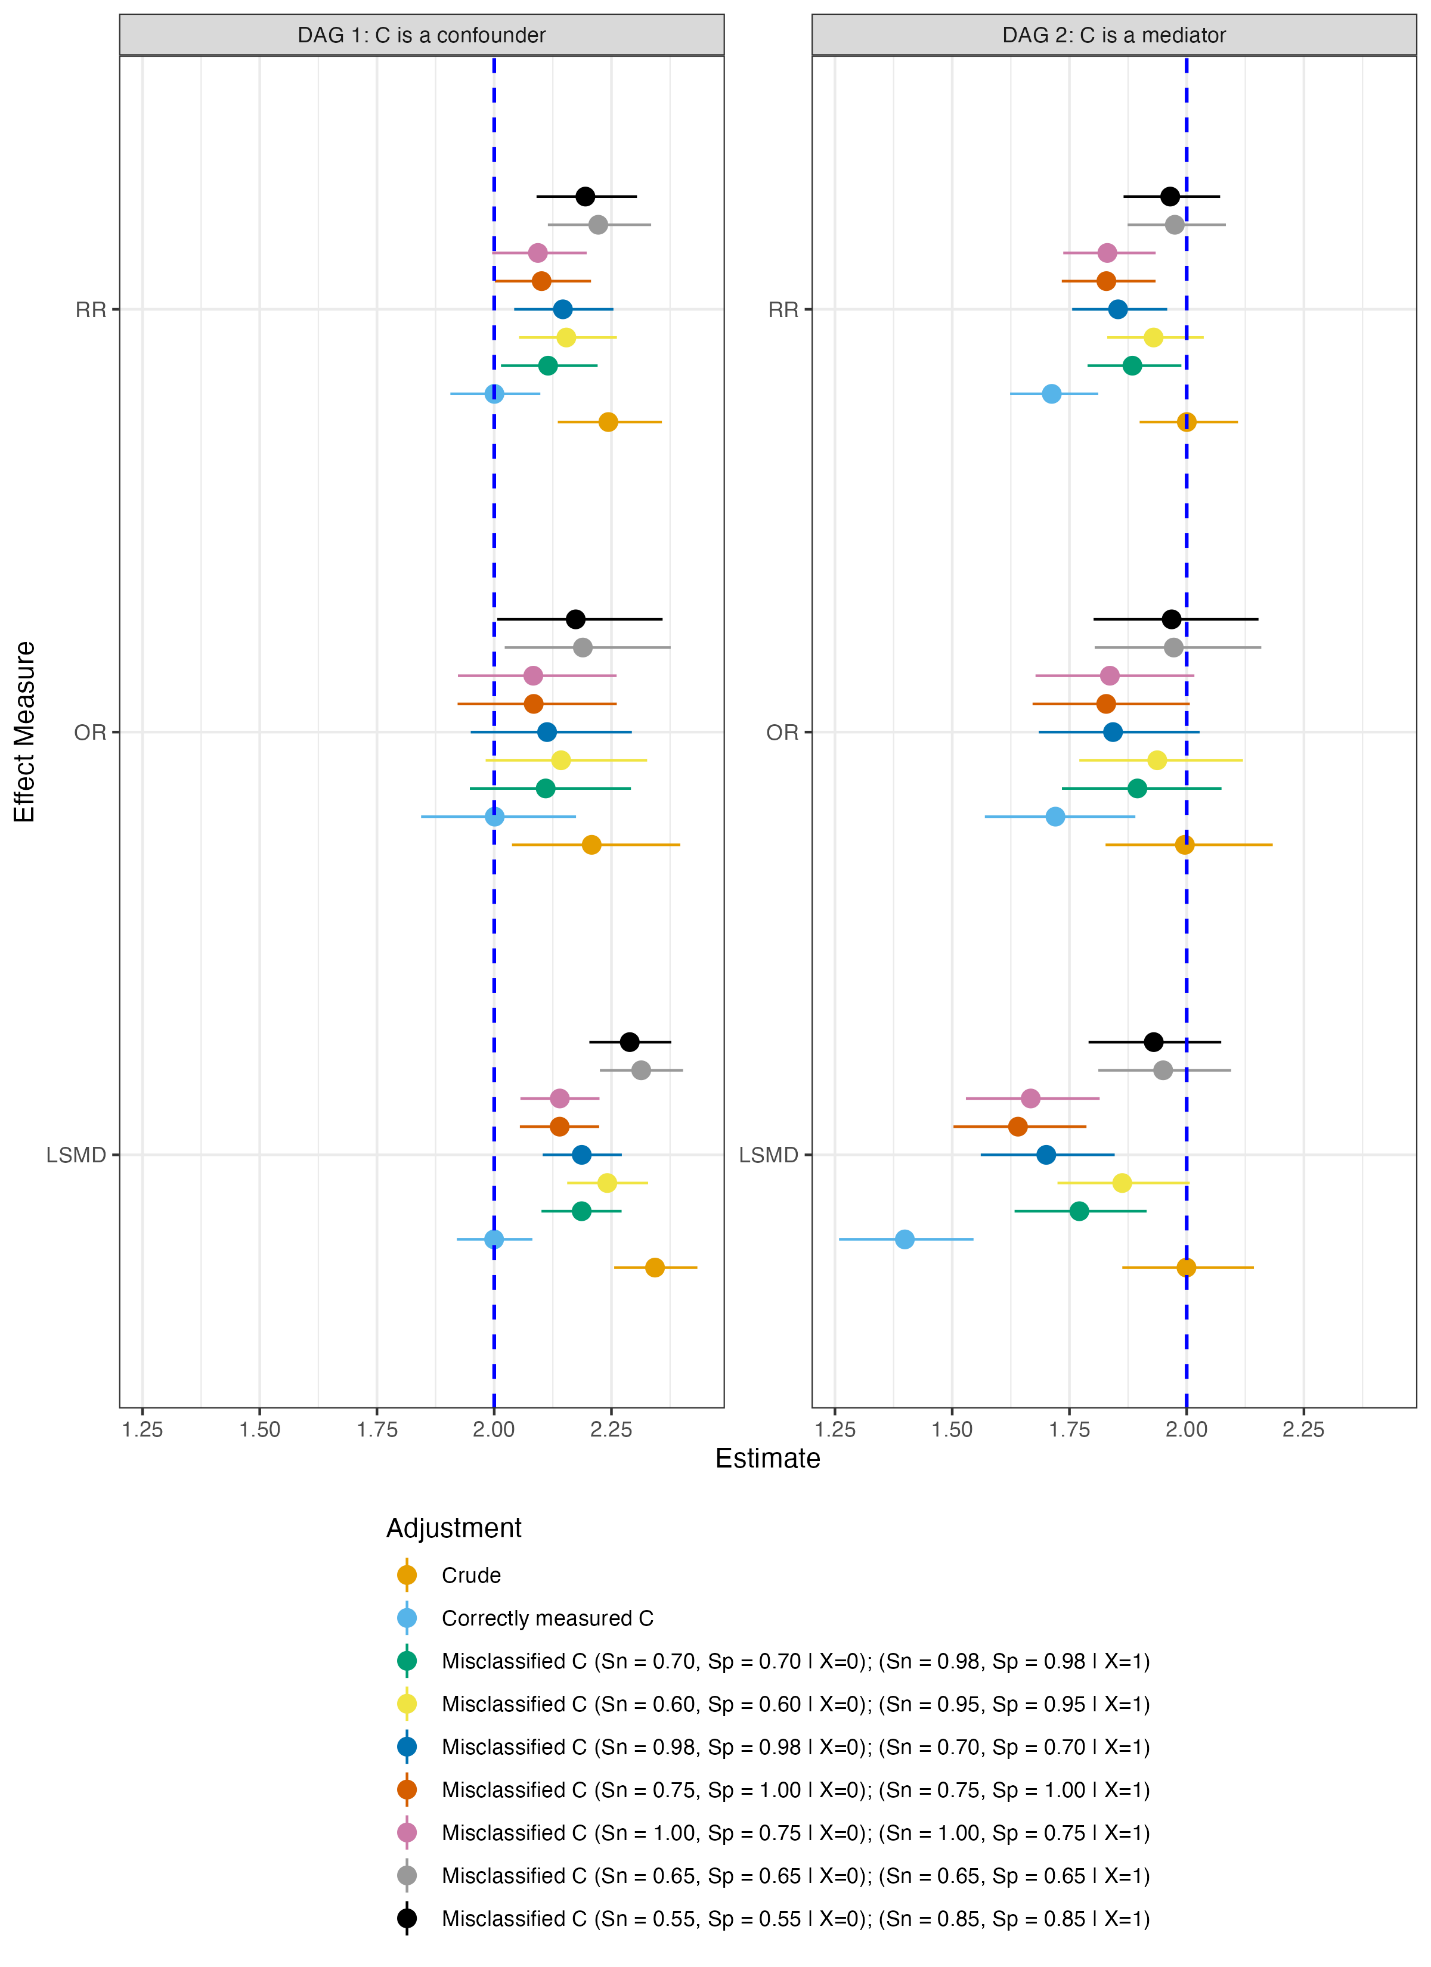

Supplement: Supplementary file 1 [file 535276%20Supplementary%20files.docx]
